# Supplementary material for: Is the QCI framework suited for monitoring outcomes and costs in a teaching hospital using value-based healthcare principles? A retrospective cohort study
Source: PubMed Central journal article supplement — BMJ Open. 2024 May 1;14(5):e080257. doi: 10.1136/bmjopen-2023-080257 (PMC11086573; doi:10.1136/bmjopen-2023-080257), 2024-05-01
Supplement: bmjopen-2023-080257supp002.pdf [file bmjopen-2023-080257supp002.pdf]

### Breast cancer population

1A: Resulting outcome per Year Quarter

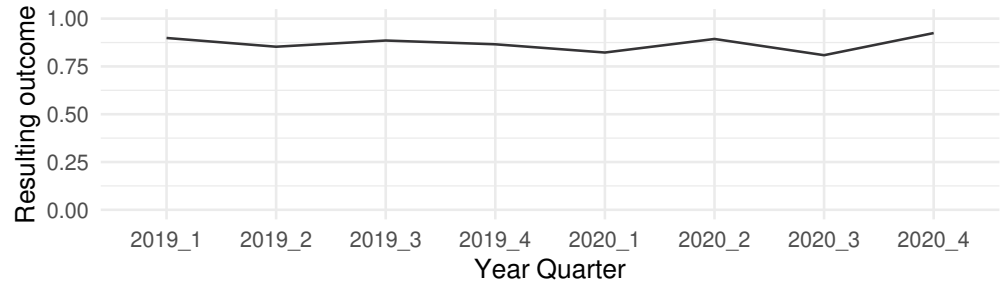

population — Breast cancer care

### Breast cancer population excluding outliers

1B: Resulting outcome per Year Quarter

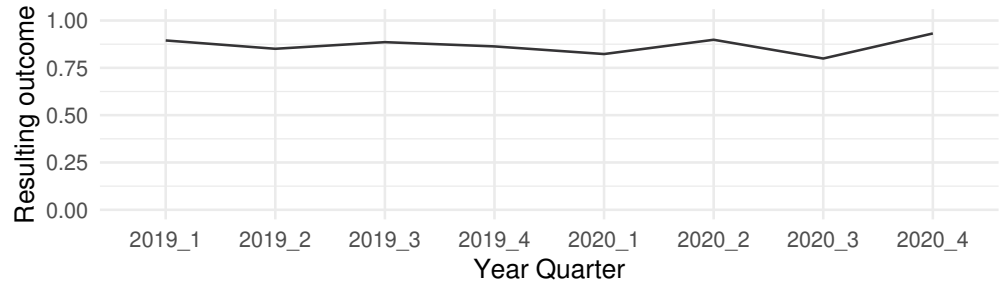

population — Breast cancer care excluding outliers

2A: Average total Costs per Year Quarter

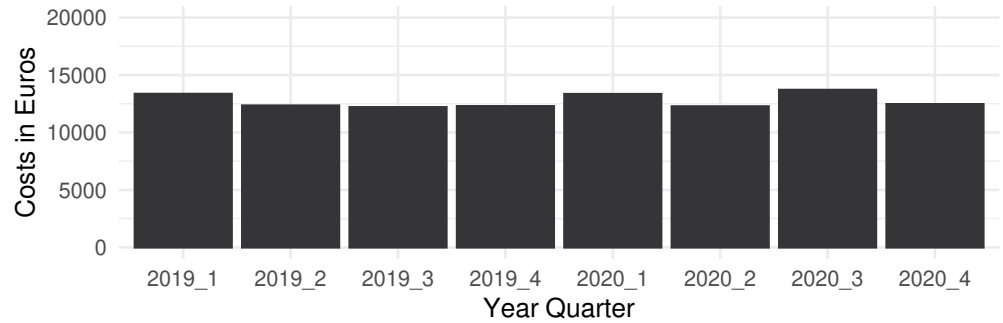

population ■ Breast cancer care

2B: Average total Costs per Year Quarter

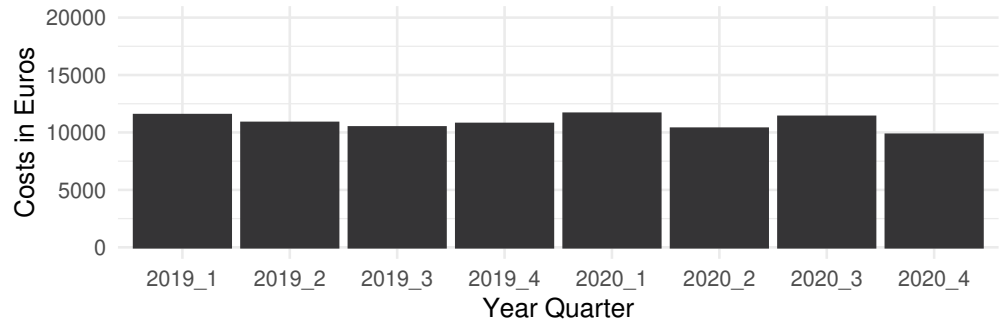

population ■ Breast cancer care excluding outliers

3A: QCI values per Year Quarter

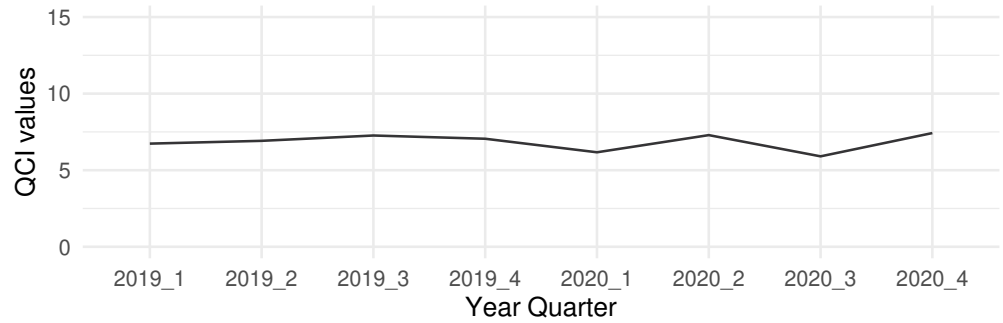

population — Breast cancer care

3B: QCI values per Year Quarter

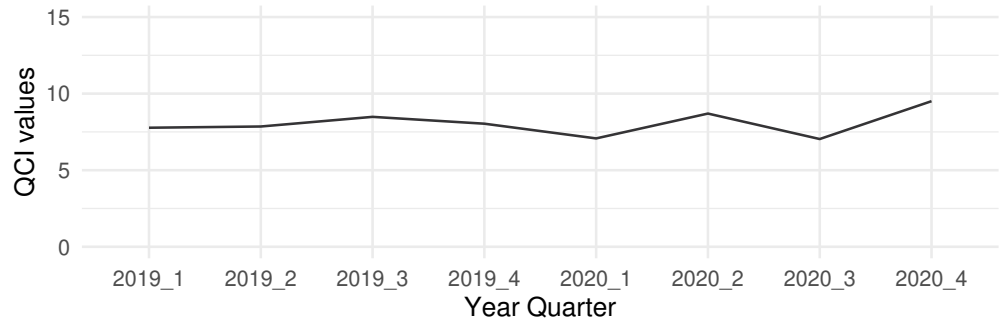

population — Breast cancer care excluding outliers
